# Supplementary material for: Impact of Forest Management on the Temporal Dynamics of Herbaceous Plant Diversity in the Carpathian Beech Forests over 40 Years
Source: MDPI journal article supplement (doi:10.3390/biology10050406), 2021-05-05
Supplement: s1 [file s1]

**Table S1.** Herbaceous species with more than 10% changes in frequency of occurrence and/or significant changes in abundance. Increases in frequency of occurrence and/or abundance of species are marked in bold and decreases by underlining. L, T, F, R, N: Ellenberg's indicator values for light, temperature, moisture, reaction and nitrogen.

|                                     | Frequency of occurrences (%) |       |       | Changes in frequency of occurrence (%) |                     |                    | Total abundance (sum of the mid-point percentage cover values) |       |       | Changes in abundance (%) |                     |                    | Ellenberg indicator values (EIVs) |   |   |   |   |
|-------------------------------------|------------------------------|-------|-------|----------------------------------------|---------------------|--------------------|----------------------------------------------------------------|-------|-------|--------------------------|---------------------|--------------------|-----------------------------------|---|---|---|---|
|                                     | 1970s                        | 2000s | 2010s | First study period                     | Second study period | Total study period | 1970s                                                          | 2000s | 2010s | First study period       | Second study period | Total study period | L                                 | T | F | R | N |
| <b>Winners</b>                      |                              |       |       |                                        |                     |                    |                                                                |       |       |                          |                     |                    |                                   |   |   |   |   |
| <i>Acer platanoides</i>             | 1.5                          | 41.8  | 10.4  | 40.3                                   | -31.3               | <b>9.0</b>         | 0.5                                                            | 16.5  | 16.0  | 16.0                     | -0.5                | <b>15.5</b>        | 4                                 | 6 | x | x | x |
| <i>Anemone nemorosa</i>             | 52.2                         | 88.1  | 59.7  | 35.8                                   | -28.4               | <b>7.5</b>         | 212.5                                                          | 519.0 | 336.0 | 336.5                    | -183.0              | <b>123.5</b>       | x                                 | x | 5 | x | x |
| <i>Carex sylvatica</i>              | 26.9                         | 50.7  | 34.3  | 23.9                                   | -16.4               | <b>7.5</b>         | 9.0                                                            | 24.5  | 66.0  | 15.5                     | 41.5                | <b>57.0</b>        | 2                                 | 5 | 5 | 6 | 5 |
| <i>Dryopteris</i> sp.               | 86.6                         | 94.0  | 95.5  | 7.5                                    | 1.5                 | <b>9.0</b>         | 44.0                                                           | 73.5  | 434.0 | 29.5                     | 361.0               | <b>390.5</b>       | -                                 | - | - | - | - |
| <i>Impatiens parviflora</i>         | 0.0                          | 13.4  | 7.5   | 13.4                                   | -6.0                | <b>7.5</b>         | 0.0                                                            | 9.5   | 24.5  | 9.5                      | 15.0                | <b>24.5</b>        | 4                                 | 6 | 5 | x | 6 |
| <i>Juncus effusus</i>               | 0.0                          | 1.5   | 10.4  | 1.5                                    | 9.0                 | <b>10.4</b>        | 0.0                                                            | 0.5   | 25.5  | 0.5                      | 25.0                | <b>25.5</b>        | 8                                 | 5 | 7 | 3 | 4 |
| <i>Lysimachia nemorum</i>           | 0.0                          | 26.9  | 10.4  | 26.9                                   | -16.4               | <b>10.4</b>        | 0.0                                                            | 11.5  | 25.5  | 11.5                     | 14.0                | <b>25.5</b>        | 2                                 | 5 | 7 | 7 | 7 |
| <i>Lysimachia vulgaris</i>          | 0.0                          | 0.0   | 9.0   | 0.0                                    | 9.0                 | <b>9.0</b>         | 0.0                                                            | 0.0   | 25.0  | 0.0                      | 25.0                | <b>25.0</b>        | 6                                 | x | 8 | x | x |
| <i>Platanthera bifolia</i>          | 0.0                          | 0.0   | 7.5   | 0.0                                    | 7.5                 | <b>7.5</b>         | 0.0                                                            | 0.0   | 5.0   | 0.0                      | 5.0                 | <b>5.0</b>         | 6                                 | x | 5 | 7 | x |
| <i>Rubus hirtus</i>                 | 67.2                         | 79.1  | 85.1  | 11.9                                   | 6.0                 | <b>17.9</b>        | 52.5                                                           | 552.5 | 569.0 | 500.0                    | 16.5                | <b>516.5</b>       | 7                                 | 4 | 5 | x | x |
| <i>Rumex obtusifolius</i>           | 0.0                          | 4.5   | 14.9  | 4.5                                    | 10.4                | <b>14.9</b>        | 0.0                                                            | 1.5   | 17.5  | 1.5                      | 16.0                | <b>17.5</b>        | 7                                 | 5 | 6 | x | 9 |
| <i>Salvia glutinosa</i>             | 56.7                         | 53.7  | 65.7  | -3.0                                   | 11.9                | <b>9.0</b>         | 24.0                                                           | 35.0  | 216.0 | 11.0                     | 181.0               | <b>192.0</b>       | 4                                 | 5 | 6 | 7 | 7 |
| <i>Anthriscus sylvestris</i>        | 0.0                          | 0.0   | 10.4  | 0.0                                    | 10.4                | <b>10.4</b>        | 0.0                                                            | 0.0   | 25.5  | 0.0                      | 25.5                | 25.5               | 7                                 | x | 5 | x | 8 |
| <i>Acer pseudoplatanus</i>          | 71.6                         | 88.1  | 73.1  | 16.4                                   | -14.9               | 1.5                | 29.0                                                           | 110.5 | 230.0 | 81.5                     | 119.5               | <b>201.0</b>       | 4                                 | x | 6 | x | 7 |
| <i>Galium odoratum</i>              | 79.1                         | 76.1  | 74.6  | -3.0                                   | -1.5                | -4.5               | 239.0                                                          | 261.0 | 573.0 | 22.0                     | 312.0               | <b>334.0</b>       | 2                                 | 5 | 5 | 6 | 5 |
| <i>Hieracium murorum</i>            | 0.0                          | 0.0   | 6.0   | 0.0                                    | 6.0                 | 6.0                | 0.0                                                            | 0.0   | 7.0   | 0.0                      | 7.0                 | <b>7.0</b>         | -                                 | - | - | - | - |
| <i>Impatiens noli-tangere</i>       | 58.2                         | 64.2  | 59.7  | 6.0                                    | -4.5                | 1.5                | 310.0                                                          | 203.0 | 584.0 | -107.0                   | 381.0               | <b>274.0</b>       | 4                                 | 5 | 7 | 7 | 6 |
| <i>Polystichum braunii</i>          | 0.0                          | 1.5   | 6.0   | 1.5                                    | 4.5                 | 6.0                | 0.0                                                            | 0.5   | 9.5   | 0.5                      | 9.0                 | <b>9.5</b>         | 3                                 | 4 | 6 | 6 | 7 |
| <i>Senecio</i> sp.                  | 65.7                         | 74.6  | 67.2  | 9.0                                    | -7.5                | 1.5                | 24.5                                                           | 32.5  | 146.0 | 8.0                      | 113.5               | <b>121.5</b>       | 7                                 | - | - | x | 8 |
| <i>Stellaria holostea</i>           | 7.5                          | 13.4  | 13.4  | 6.0                                    | 0.0                 | 6.0                | 2.5                                                            | 21.5  | 60.5  | 19.0                     | 39.0                | <b>58.0</b>        | 5                                 | 6 | 5 | 6 | 5 |
| <i>Veronica montana</i>             | 23.9                         | 58.2  | 17.9  | 34.3                                   | -40.3               | -6.0               | 13.0                                                           | 19.5  | 33.5  | 6.5                      | 14.0                | <b>20.5</b>        | 4                                 | 5 | 7 | 5 | 6 |
| <b>Losers</b>                       |                              |       |       |                                        |                     |                    |                                                                |       |       |                          |                     |                    |                                   |   |   |   |   |
| <i>Anthriscus nitida</i>            | 22.4                         | 31.3  | 1.5   | 9.0                                    | -29.9               | <u>-20.9</u>       | 7.5                                                            | 27.5  | 3.0   | 20.0                     | -24.5               | <u>-4.5</u>        | 4                                 | 4 | 6 | 8 | 8 |
| <i>Arum alpinum</i>                 | 10.4                         | 1.5   | 1.5   | -9.0                                   | 0.0                 | <u>-9.0</u>        | 3.5                                                            | 0.5   | 0.5   | -3.0                     | 0.0                 | <u>-3.0</u>        | -                                 | - | - | - | - |
| <i>Athyrium filix-femina</i>        | 89.6                         | 98.5  | 23.9  | 9.0                                    | -74.6               | <u>-65.7</u>       | 128.5                                                          | 330.0 | 67.0  | 201.5                    | -263.0              | <u>-61.5</u>       | 3                                 | x | 7 | x | 6 |
| <i>Chaerophyllum aromaticum</i>     | 10.4                         | 3.0   | 0.0   | -7.5                                   | -3.0                | <u>-10.4</u>       | 3.5                                                            | 1.0   | 0.0   | -2.5                     | -1.0                | <u>-3.5</u>        | 7                                 | 5 | 7 | 6 | 8 |
| <i>Chrysosplenium alternifolium</i> | 17.9                         | 1.5   | 0.0   | -16.4                                  | -1.5                | <u>-17.9</u>       | 6.0                                                            | 0.5   | 0.0   | -5.5                     | -0.5                | <u>-6.0</u>        | 4                                 | 4 | 8 | 7 | 5 |
| <i>Corylus avellana</i>             | 35.8                         | 19.4  | 11.9  | -16.4                                  | -7.5                | <u>-23.9</u>       | 12.0                                                           | 6.5   | 9.0   | -5.5                     | 2.5                 | <u>-3.0</u>        | 6                                 | 5 | x | x | 5 |
| <i>Daphne mezereum</i>              | 44.8                         | 10.4  | 3.0   | -34.3                                  | -7.5                | <u>-41.8</u>       | 15.0                                                           | 3.5   | 1.0   | -11.5                    | -2.5                | <u>-14.0</u>       | 4                                 | x | 5 | 7 | 5 |
| <i>Galeopsis speciosa</i>           | 7.5                          | 22.4  | 0.0   | 14.9                                   | -22.4               | <u>-7.5</u>        | 2.5                                                            | 7.5   | 0     | 5.0                      | -7.5                | <u>-2.5</u>        | 7                                 | x | 5 | x | 8 |
| <i>Gentiana asclepiadea</i>         | 11.9                         | 1.5   | 4.5   | -10.4                                  | 3.0                 | <u>-7.5</u>        | 6.5                                                            | 0.5   | 4.0   | -6.0                     | 3.5                 | <u>-2.5</u>        | 7                                 | x | 6 | 7 | 2 |
| <i>Geranium phaeum</i>              | 23.9                         | 11.9  | 3.0   | -11.9                                  | -9.0                | <u>-20.9</u>       | 8.0                                                            | 4.0   | 6.0   | -4.0                     | 2.0                 | <u>-2.0</u>        | 6                                 | x | 5 | 6 | 5 |
| <i>Glechoma hirsuta</i>             | 52.2                         | 55.2  | 20.9  | 3.0                                    | -34.3               | <u>-31.3</u>       | 52.5                                                           | 31.0  | 51.5  | -21.5                    | 20.5                | <u>-1.0</u>        | -                                 | - | - | - | - |
| <i>Lonicera xylosteum</i>           | 23.9                         | 6.0   | 0.0   | -17.9                                  | -6.0                | <u>-23.9</u>       | 8.0                                                            | 2.0   | 0.0   | -6.0                     | -2.0                | <u>-8.0</u>        | 5                                 | 6 | 5 | 7 | 6 |
| <i>Mercurialis perennis</i>         | 74.6                         | 71.6  | 53.7  | -3.0                                   | -17.9               | <u>-20.9</u>       | 409.5                                                          | 175.5 | 307.0 | -234.0                   | 131.5               | <u>-102.5</u>      | 2                                 | x | x | 8 | 7 |
| <i>Oxalis acetosella</i>            | 65.7                         | 74.6  | 41.8  | 9.0                                    | -32.8               | <u>-23.9</u>       | 314.5                                                          | 71.5  | 109.5 | -243.0                   | 38.0                | <u>-205.5</u>      | 1                                 | x | 5 | 4 | 6 |
| <i>Phyteuma spicatum</i>            | 10.4                         | 4.5   | 0.0   | -6.0                                   | -4.5                | <u>-10.4</u>       | 3.5                                                            | 1.5   | 0.0   | -2.0                     | -1.5                | <u>-3.5</u>        | x                                 | x | 5 | 6 | 5 |
| <i>Polygonatum multiflorum</i>      | 55.2                         | 44.8  | 13.4  | -10.4                                  | -31.3               | <u>-41.8</u>       | 18.5                                                           | 15.0  | 9.5   | -3.5                     | -5.5                | <u>-9.0</u>        | 2                                 | x | 5 | 6 | 5 |
| <i>Populus tremula</i>              | 11.9                         | 1.5   | 1.5   | -10.4                                  | 0.0                 | <u>-10.4</u>       | 4.0                                                            | 0.5   | 0.5   | -3.5                     | 0.0                 | <u>-3.5</u>        | 6                                 | 5 | 5 | x | x |
| <i>Primula elatior</i>              | 9.0                          | 6.0   | 0.0   | -3.0                                   | -6.0                | <u>-9.0</u>        | 3.0                                                            | 2.0   | 0.0   | -1.0                     | -2.0                | <u>-3.0</u>        | 6                                 | x | 6 | 7 | 7 |
| <i>Ribes uva-crispa</i>             | 40.3                         | 25.4  | 7.5   | -14.9                                  | -17.9               | <u>-32.8</u>       | 13.5                                                           | 8.5   | 10.0  | -5.0                     | 1.5                 | <u>-3.5</u>        | 4                                 | 5 | x | x | 6 |
| <i>Sambucus racemosa</i>            | 11.9                         | 14.9  | 3.0   | 3.0                                    | -11.9               | <u>-9.0</u>        | 4.0                                                            | 5.0   | 3.5   | 1.0                      | -1.5                | <u>-0.5</u>        | 6                                 | 4 | 5 | 5 | 8 |
| <i>Sanicula europaea</i>            | 28.4                         | 10.4  | 7.5   | -17.9                                  | -3.0                | <u>-20.9</u>       | 9.5                                                            | 6.0   | 7.5   | -3.5                     | 1.5                 | <u>-2.0</u>        | 4                                 | 5 | 5 | 8 | 6 |
| <i>Stellaria nemorum</i>            | 19.4                         | 40.3  | 0.0   | 20.9                                   | -40.3               | <u>-19.4</u>       | 9.0                                                            | 13.5  | 0.0   | 4.5                      | -13.5               | <u>-9.0</u>        | 4                                 | x | 7 | 5 | 7 |
| <i>Symphytum tuberosum</i>          | 11.9                         | 10.4  | 1.5   | -1.5                                   | -9.0                | <u>-10.4</u>       | 4.0                                                            | 20.5  | 3.0   | 16.5                     | -17.5               | <u>-1.0</u>        | 5                                 | 8 | 5 | 6 | 7 |
| <i>Viburnum opulus</i>              | 13.4                         | 0.0   | 0.0   | -13.4                                  | 0.0                 | <u>-13.4</u>       | 4.5                                                            | 0.0   | 0.0   | -4.5                     | 0.0                 | <u>-4.5</u>        | 6                                 | 5 | x | 7 | 6 |

Table 4. Continuation.

|                               | Frequency of occurrences (%) |       |       | Changes in frequency of occurrence (%) |                     |                    | Total abundance (sum of the mid-point percentage cover values) |       |       | Changes in abundance (%) |                     |                    | Ellenberg indicator values (EIVs) |   |   |   |   |
|-------------------------------|------------------------------|-------|-------|----------------------------------------|---------------------|--------------------|----------------------------------------------------------------|-------|-------|--------------------------|---------------------|--------------------|-----------------------------------|---|---|---|---|
|                               | 1970s                        | 2000s | 2010s | First study period                     | Second study period | Total study period | 1970s                                                          | 2000s | 2010s | First study period       | Second study period | Total study period | L                                 | T | F | R | N |
| <i>Viola reichenbachiana</i>  | 19.4                         | 23.9  | 9.0   | 4.5                                    | -14.9               | <u>-10.4</u>       | 9.0                                                            | 8.0   | 5.5   | -1.0                     | -2.5                | <u>-3.5</u>        | 4                                 | x | 5 | 7 | 6 |
| <i>Abies alba</i>             | 71.6                         | 70.1  | 50.7  | -1.5                                   | -19.4               | <u>-20.9</u>       | 26.5                                                           | 23.5  | 141   | -3.0                     | 117.0               | 114.0              | 3                                 | 5 | x | x | x |
| <i>Actaea spicata</i>         | 61.2                         | 41.8  | 17.9  | -19.4                                  | -23.9               | <u>-43.3</u>       | 20.5                                                           | 14    | 38    | -6.5                     | 24.0                | 17.5               | 3                                 | 5 | 5 | 6 | 7 |
| <i>Carex pilosa</i>           | 53.7                         | 47.8  | 40.3  | -6.0                                   | -7.5                | <u>-13.4</u>       | 687.5                                                          | 847.5 | 730.5 | 160.0                    | -117.0              | 43.0               | 4                                 | 6 | 5 | 5 | 5 |
| <i>Circaea lutetiana</i>      | 46.3                         | 56.7  | 38.8  | 10.4                                   | -17.9               | <u>-7.5</u>        | 18.0                                                           | 33.5  | 113.5 | 15.5                     | 80.0                | 95.5               | 4                                 | 5 | 6 | 7 | 7 |
| <i>Dentaria bulbifera</i>     | 91.0                         | 91.0  | 74.6  | 0.0                                    | -16.4               | <u>-16.4</u>       | 320                                                            | 463   | 323   | 142.5                    | -140.0              | 2.5                | 3                                 | 5 | 5 | 7 | 6 |
| <i>Euphorbia amygdaloides</i> | 26.9                         | 26.9  | 14.9  | 0.0                                    | -11.9               | <u>-11.9</u>       | 11.5                                                           | 11.5  | 20.0  | 0.0                      | 8.5                 | 8.5                | 4                                 | 5 | 5 | 8 | 5 |
| <i>Fraxinus excelsior</i>     | 38.8                         | 61.2  | 10.4  | 22.4                                   | -50.7               | <u>-28.4</u>       | 15.5                                                           | 93.5  | 28.0  | 78.0                     | -65.5               | 12.5               | 4                                 | 5 | x | 7 | 7 |
| <i>Milium effusum</i>         | 46.3                         | 47.8  | 35.8  | 1.5                                    | -11.9               | <u>-10.4</u>       | 15.5                                                           | 21.0  | 54.0  | 5.5                      | 33.0                | 38.5               | 4                                 | x | 5 | 5 | 5 |
| <i>Paris quadrifolia</i>      | 44.8                         | 56.7  | 25.4  | 11.9                                   | -31.3               | <u>-19.4</u>       | 15.0                                                           | 19.0  | 26.0  | 4.0                      | 7.0                 | 11.0               | 3                                 | x | 6 | 7 | 7 |
| <i>Petasites albus</i>        | 46.3                         | 28.4  | 20.9  | -17.9                                  | -7.5                | <u>-25.4</u>       | 106.5                                                          | 43.5  | 158.0 | -63.0                    | 114.5               | 51.5               | 4                                 | 4 | 6 | x | 5 |
| <i>Prenanthes purpurea</i>    | 9.0                          | 9.0   | 1.5   | 0.0                                    | -7.5                | <u>-7.5</u>        | 3.0                                                            | 3.0   | 3.0   | 0.0                      | 0.0                 | 0.0                | 4                                 | 4 | 5 | 5 | 5 |
| <i>Scrophularia nodosa</i>    | 16.4                         | 14.9  | 4.5   | -1.5                                   | -10.4               | <u>-11.9</u>       | 5.5                                                            | 5.0   | 6.5   | -0.5                     | 1.5                 | 1.0                | 4                                 | 5 | 6 | 6 | 7 |
| <i>Symphytum cordatum</i>     | 68.7                         | 68.7  | 59.7  | 0.0                                    | -9.0                | <u>-9.0</u>        | 243.5                                                          | 281.0 | 160.5 | 37.5                     | -120.5              | -83.0              | -                                 | - | - | - | - |
| <i>Ulmus glabra</i>           | 23.9                         | 35.8  | 10.4  | 11.9                                   | -25.4               | <u>-13.4</u>       | 22.5                                                           | 12.0  | 13.5  | -10.5                    | 1.5                 | -9.0               | 4                                 | 5 | 6 | 7 | 7 |
| <i>Carex digitata</i>         | 4.5                          | 9.0   | 0.0   | 4.5                                    | -9.0                | -4.5               | 1.5                                                            | 3.0   | 0.0   | 1.5                      | -3.0                | <u>-1.5</u>        | 3                                 | x | 5 | x | 4 |
| <i>Cerasus avium</i>          | 1.5                          | 6.0   | 0.0   | 4.5                                    | -6.0                | -1.5               | 0.5                                                            | 2.0   | 0.0   | 1.5                      | -2.0                | <u>-0.5</u>        | -                                 | - | - | - | - |
| <i>Circaea alpina</i>         | 4.5                          | 7.5   | 0.0   | 3.0                                    | -7.5                | -4.5               | 1.5                                                            | 2.5   | 0.0   | 1.0                      | -2.5                | <u>-1.5</u>        | 4                                 | 4 | 7 | 5 | 5 |
| <i>Dentaria glandulosa</i>    | 61.2                         | 46.3  | 61.2  | -14.9                                  | 14.9                | 0.0                | 275.0                                                          | 86.5  | 220.5 | -188.5                   | 134.0               | <u>-54.5</u>       | -                                 | - | - | - | - |
| <i>Euonymus europaea</i>      | 6.0                          | 13.4  | 0.0   | 7.5                                    | -13.4               | -6.0               | 2.0                                                            | 4.5   | 0.0   | 2.5                      | -4.5                | <u>-2.0</u>        | 6                                 | 5 | 5 | 8 | 5 |
| <i>Rubus idaeus</i>           | 3.0                          | 14.9  | 0.0   | 11.9                                   | -14.9               | -3.0               | 1.0                                                            | 19.5  | 0.0   | 18.5                     | -19.5               | <u>-1.0</u>        | 7                                 | x | x | x | 6 |
| Mixed reaction                |                              |       |       |                                        |                     |                    |                                                                |       |       |                          |                     |                    |                                   |   |   |   |   |
| <i>Fagus sylvatica</i>        | 59.7                         | 92.5  | 38.8  | 32.8                                   | -53.7               | <u>-20.9</u>       | 39.5                                                           | 53.0  | 120.5 | 13.5                     | 67.5                | <b>81.0</b>        | 3                                 | 5 | 5 | x | x |
| <i>Galeobdolon luteum</i>     | 92.5                         | 95.5  | 83.6  | 3.0                                    | -11.9               | <u>-9.0</u>        | 258.5                                                          | 480.0 | 714.5 | 221.5                    | 234.5               | <b>456.0</b>       | -                                 | - | - | - | - |
| <i>Geranium robertianum</i>   | 52.2                         | 19.4  | 20.9  | -32.8                                  | 1.5                 | <u>-31.3</u>       | 20.0                                                           | 6.5   | 53.5  | -13.5                    | 47.0                | <b>33.5</b>        | 5                                 | x | x | x | 7 |
| <i>Pulmonaria obscura</i>     | 73.1                         | 58.2  | 14.9  | -14.9                                  | -43.3               | <u>-58.2</u>       | 49.5                                                           | 19.5  | 54.0  | -30.0                    | 34.5                | <b>4.5</b>         | 4                                 | 5 | 6 | 8 | 7 |
